# Supplementary material
Source: MDPI journal article supplement (https://www.mdpi.com/2076-3263/8/5/169)
Supplement: s1 [file s1]

## Sheet: BCB-COL
BCB-COL
Baylis Quarry
Table S1-A. U-Pb geochronologic analyses.
							Isotope ratios						Apparent ages (Ma)
Analysis	U	206Pb	U/Th	206Pb*	±	207Pb*	±	206Pb*	±	error	206Pb*	±	207Pb*	±	206Pb*	±	Best age	±	Conc
	(ppm)	204Pb		207Pb*	(%)	235U*	(%)	238U	(%)	corr.	238U*	(Ma)	235U	(Ma)	207Pb*	(Ma)	(Ma)	(Ma)	(%)
BCB COL-1 <>	634.173	26628.9	114.298	18.8217	2.30226	0.438658	6.26837	0.0598801	5.83027	0.930109	374.896	21.2341	369.306	19.4091	334.388	52.1695	374.896	21.2341	NA
BCB COL-2 <>	591.744	28593.3	121.597	18.3616	3.32389	0.448841	6.44025	0.0597727	5.51621	0.856521	374.243	20.0563	376.468	20.2611	390.158	74.6419	374.243	20.0563	NA
BCB COL-3 <>	620.988	27682.6	118.223	18.8023	2.83148	0.444543	4.28387	0.0606209	3.2147	0.75042	379.401	11.8446	373.451	13.3867	336.705	64.1662	379.401	11.8446	NA
BCB COL-3 <>	578.388	26810.7	118.084	18.688	1.69527	0.435615	6.90983	0.0590424	6.69864	0.969437	369.799	24.0745	367.156	21.2924	350.475	38.2976	369.799	24.0745	NA
BCB COL-5 <>	631.693	31671.1	117.188	18.3768	1.68874	0.462731	4.86757	0.0616734	4.56524	0.937888	385.794	17.0958	386.155	15.6365	388.296	37.9083	385.794	17.0958	NA
BCB COL-6 <>	631.893	27899.1	116.359	18.5773	1.58597	0.445999	5.40386	0.0600918	5.16589	0.955962	376.184	18.8771	374.474	16.9254	363.884	35.7424	376.184	18.8771	NA
BCB COL-7 <>	652.43	28190.9	115.945	18.4912	2.63785	0.436072	6.70123	0.0584821	6.16021	0.919266	366.388	21.9409	367.479	20.6646	374.349	59.3803	366.388	21.9409	NA
BCB COL-8 <>	619.637	30080.7	118.009	18.4415	1.7172	0.447986	5.54071	0.0599183	5.26789	0.950761	375.129	19.1974	375.868	17.4076	380.406	38.5953	375.129	19.1974	NA
BCB COL-9 <>	670.581	30371.8	113.314	18.6164	2.6124	0.446276	5.14043	0.0602556	4.42712	0.861236	377.18	16.2191	374.668	16.1071	359.145	58.9429	377.18	16.2191	NA
BCB COL-10 <>	655.003	29546.6	115.95	18.5059	1.14455	0.450732	6.1031	0.0604962	5.99482	0.982258	378.642	22.0452	377.792	19.2559	372.559	25.7644	378.642	22.0452	NA
BCB COL-11 <>	647.485	29088.8	110.423	18.5692	2.97878	0.449095	6.71927	0.0604825	6.02291	0.896364	378.559	22.1438	376.646	21.1474	364.875	67.1693	378.559	22.1438	NA
BCB COL-12 <>	656.67	30742.2	114.431	18.1909	1.4574	0.442926	4.57324	0.0584365	4.33481	0.947863	366.11	15.428	372.313	14.2551	411.081	32.5935	366.11	15.428	NA
BCB COL-13 <>	606.899	29153	113.248	18.6589	2.20023	0.446641	7.02824	0.0604426	6.67496	0.949735	378.316	24.5259	374.924	22.0365	354.015	49.705	378.316	24.5259	NA
BCB COL-14 <>	626.207	28114.9	113.979	18.6561	1.56528	0.42983	5.60154	0.0581588	5.37839	0.960164	364.418	19.0562	363.056	17.0998	354.366	35.357	364.418	19.0562	NA
BCB COL-15 <>	591.687	27915.3	119.436	18.4455	2.03903	0.449365	5.39195	0.0601157	4.99153	0.925739	376.329	18.2469	376.834	16.9761	379.92	45.8307	376.329	18.2469	NA
BCB COL-16 <>	601.781	30407.2	122.512	18.4489	2.50658	0.448366	5.80085	0.0599933	5.23133	0.901823	375.585	19.0867	376.135	18.2357	379.5	56.3679	375.585	19.0867	NA
BCB COL-17 <>	618.009	28461.1	115.766	18.5224	1.26061	0.440068	3.10282	0.0591174	2.8352	0.913749	370.256	10.2017	370.3	9.62799	370.556	28.391	370.256	10.2017	NA
BCB COL-18 <>	582.955	26281.2	118.795	18.6255	3.49158	0.429755	7.59518	0.0580535	6.74504	0.888069	363.777	23.8575	363.003	23.1848	358.036	78.8112	363.777	23.8575	NA
BCB COL-19 <>	591.755	29210.3	121.85	19.1673	2.46662	0.422612	4.18976	0.0587492	3.38673	0.808334	368.014	12.1146	357.917	12.6385	292.95	56.3414	368.014	12.1146	NA
BCB COL-20 <>	591.127	27753.5	120.671	18.2252	1.79461	0.438492	3.45821	0.0579606	2.95611	0.854809	363.211	10.4401	369.189	10.7042	406.873	40.1646	363.211	10.4401	NA
Mean	620.055	28730.2	117.004	18.5596	2.16502	0.44273	5.55601	0.0595872	5.0699	0.908025	373.112	18.3843	372.157	17.3126	366.127	48.817	373.112	18.3843
std	26.7366	1405.29	3.15815	0.213195	0.660177	0.00884112	1.18407	0.00099898	1.20179	0.0567134	6.07792	4.36036	6.2275	3.67564	25.817	14.9343	6.07792	4.36036

## Sheet: #25232
NYSM #25232
Kinkel Quarry
Table S1-B. U-Pb geochronologic analyses.
							Isotope ratios						Apparent ages (Ma)
Analysis	U	206Pb	U/Th	206Pb*	±	207Pb*	±	206Pb*	±	error	206Pb*	±	207Pb*	±	206Pb*	±	Best age	±	Conc
	(ppm)	204Pb		207Pb*	(%)	235U*	(%)	238U	(%)	corr.	238U*	(Ma)	235U	(Ma)	207Pb*	(Ma)	(Ma)	(Ma)	(%)
COLUMBITE-K32-16 <>	310.075	114165	352.922	18.345	1.98124	0.432944	6.65627	0.0576036	6.35458	0.954675	361.035	22.3117	365.265	20.4231	392.184	44.4562	361.035	22.3117	NA
COLUMBITE-K32-17 <>	310.136	107862	345.958	18.4024	1.01668	0.432862	4.2911	0.0577728	4.16892	0.971527	362.067	14.6782	365.207	13.1634	385.17	22.8392	362.067	14.6782	NA
COLUMBITE-K32-1 <>	318.932	85780.4	349.327	18.3818	1.42714	0.438977	2.81848	0.0585234	2.43046	0.862327	366.639	8.66234	369.531	8.7306	387.687	32.036	366.639	8.66234	NA
COLUMBITE-K32-18 <>	328.095	108192	358.101	18.6092	2.11442	0.434718	5.52767	0.0586723	5.10729	0.923949	367.546	18.2466	366.521	17.008	360.022	47.7048	367.546	18.2466	NA
COLUMBITE-K32-10 <>	315.18	100888	351.914	18.4206	1.46931	0.441235	3.50161	0.0589483	3.17842	0.907705	369.227	11.4058	371.123	10.8855	382.958	33.0074	369.227	11.4058	NA
COLUMBITE-K32-7 <>	316.47	89090.9	351.029	18.464	0.819195	0.440438	3.61587	0.0589808	3.52185	0.973998	369.424	12.6448	370.562	11.2267	377.659	18.4274	369.424	12.6448	NA
COLUMBITE-K32-11 <>	317.487	94685.5	351.867	18.5831	2.29906	0.438231	4.68879	0.0590638	4.08645	0.871536	369.93	14.6914	369.005	14.5076	363.176	51.8435	369.93	14.6914	NA
COLUMBITE-K32-3 <>	313.851	85708.3	348.899	18.7014	1.24284	0.435463	5.0564	0.0590642	4.90128	0.969322	369.932	17.621	367.048	15.5763	348.896	28.0785	369.932	17.621	NA
COLUMBITE-K32-4 <>	320.923	84793.5	345.215	18.6579	1.61353	0.436797	4.57126	0.0591074	4.27702	0.935633	370.195	15.3873	367.992	14.1117	354.143	36.4484	370.195	15.3873	NA
COLUMBITE-K32-6 <>	312.473	88534	352.101	18.3309	1.18746	0.445078	4.52494	0.0591722	4.36635	0.964952	370.59	15.725	373.827	14.1519	393.917	26.6354	370.59	15.725	NA
COLUMBITE-K32-20 <>	307.596	94392.8	361.699	18.5721	1.03661	0.439731	2.60809	0.0592307	2.39323	0.91762	370.945	8.62698	370.063	8.08848	364.519	23.3502	370.945	8.62698	NA
COLUMBITE-K32-8 <>	314.006	85988.7	344.842	18.453	0.696316	0.445368	4.13087	0.0596054	4.07176	0.985691	373.225	14.7653	374.031	12.9251	379.004	15.6589	373.225	14.7653	NA
COLUMBITE-K32-14 <>	311.478	102607	365.844	18.5358	1.40312	0.443551	6.69638	0.0596286	6.54773	0.977801	373.366	23.7526	372.753	20.895	368.923	31.5999	373.366	23.7526	NA
COLUMBITE-K32-12 <>	316.181	92882.8	356.675	18.4879	0.908411	0.445004	3.47548	0.0596692	3.35466	0.965237	373.613	12.1772	373.775	10.8682	374.755	20.4361	373.613	12.1772	NA
COLUMBITE-K32-9 <>	306.553	102694	355.79	18.5695	0.937319	0.44497	4.69968	0.0599279	4.60526	0.979909	375.187	16.7852	373.751	14.696	364.836	21.1226	375.187	16.7852	NA
COLUMBITE-K32-19 <>	330.813	81924.8	349.498	18.7258	1.36413	0.443618	4.7085	0.0602488	4.50657	0.957113	377.138	16.5084	372.8	14.6926	345.934	30.8489	377.138	16.5084	NA
COLUMBITE-K32-2 <>	317.172	82566.1	344.943	18.3661	1.24859	0.453851	4.39607	0.0604546	4.21502	0.958817	378.389	15.4902	379.972	13.9352	389.608	28.0283	378.389	15.4902	NA
COLUMBITE-K32-15 <>	310.43	77763.6	362.868	18.5031	1.3329	0.451992	4.92455	0.0606561	4.74073	0.962674	379.614	17.4769	378.674	15.5667	372.903	29.9891	379.614	17.4769	NA
COLUMBITE-K32-13 <>	309.901	87191.6	350.313	18.6094	0.878804	0.449955	7.32055	0.0607295	7.26761	0.992768	380.06	26.823	377.248	23.0708	359.996	19.8078	380.06	26.823	NA
COLUMBITE-K32-5 <>	312.109	91696.2	346.279	18.2969	0.820602	0.462251	4.23442	0.0613414	4.15414	0.981042	383.778	15.4774	385.822	13.5927	398.079	18.3932	383.778	15.4774	NA
Mean	314.993	92970.4	352.304	18.5008	1.28988	0.442852	4.62235	0.05942	4.41247	0.950715	372.095	15.9629	372.248	14.4058	373.218	29.0356	372.095	15.9629
SD	6.07045	9769.94	5.99761	0.123251	0.432339	0.00728945	1.18946	0.000930834	1.20845	0.0356851	5.66382	4.40982	5.1192	3.70788	14.9861	9.75166	5.66382	4.40982

## Sheet: #22361
NYSM #22361
Kinkel Quarry
Table S1-C. U-Pb geochronologic analyses.
							Isotope ratios						Apparent ages (Ma)
Analysis	U	206Pb	U/Th	206Pb*	±	207Pb*	±	206Pb*	±	error	206Pb*	±	207Pb*	±	206Pb*	±	Best age	±	Conc
	(ppm)	204Pb		207Pb*	(%)	235U*	(%)	238U	(%)	corr.	238U*	(Ma)	235U	(Ma)	207Pb*	(Ma)	(Ma)	(Ma)	(%)
COLUMBITE-K61-14 <>	665.176	56810.5	130.647	18.4894	0.860439	0.432378	3.60098	0.057981	3.49667	0.971033	363.335	12.3532	364.864	11.0376	374.569	19.3465	363.335	12.3532	NA
COLUMBITE-K61-15 <>	705.771	67102.7	119.109	18.4982	0.73827	0.441744	8.4409	0.0592649	8.40855	0.996168	371.154	30.3274	371.481	26.2662	373.503	16.6191	371.154	30.3274	NA
COLUMBITE-K61-18 <>	510.852	36846.6	149.384	18.7039	0.961507	0.445146	2.7	0.0603856	2.523	0.934443	377.97	9.262	373.875	8.44491	348.596	21.7335	377.97	9.262	NA
COLUMBITE-K61-10 <>	685.114	69460.5	118.453	18.4037	0.833092	0.455071	7.74886	0.0607412	7.70395	0.994204	380.131	28.4386	380.824	24.6121	385.015	18.7153	380.131	28.4386	NA
COLUMBITE-K61-13 <>	675.209	149028	123.124	18.1363	0.805014	0.462805	5.08962	0.0608761	5.02555	0.987412	380.951	18.5903	386.207	16.3518	417.798	17.9812	380.951	18.5903	NA
COLUMBITE-K61-8 <>	694.268	63638.8	120.357	18.4665	0.530773	0.45762	6.88679	0.0612899	6.86631	0.997026	383.465	25.5622	382.602	21.9571	377.36	11.94	383.465	25.5622	NA
COLUMBITE-K61-16 <>	511.932	45946.1	152.834	18.4901	1.05962	0.458052	6.36606	0.0614262	6.27725	0.98605	384.293	23.4182	382.902	20.3096	374.483	23.8433	384.293	23.4182	NA
COLUMBITE-K61-19 <>	480.147	35377.8	152.146	18.439	0.820126	0.46015	2.29236	0.0615367	2.14063	0.933812	384.964	7.99944	384.362	7.33537	380.714	18.4376	384.964	7.99944	NA
COLUMBITE-K61-4 <>	759.333	62272.9	124.79	18.6022	0.599572	0.460036	5.429	0.0620661	5.39579	0.993883	388.178	20.3272	384.283	17.3708	360.865	13.5166	388.178	20.3272	NA
COLUMBITE-K61-2 <>	695.544	62487.4	121.159	18.4623	0.720224	0.46464	3.68275	0.0622159	3.61164	0.98069	389.087	13.6368	387.48	11.8634	377.869	16.2005	389.087	13.6368	NA
COLUMBITE-K61-12 <>	672.96	70961.6	120.862	18.4738	0.675283	0.467138	3.7924	0.0625894	3.73179	0.984019	391.354	14.1701	389.21	12.2614	376.469	15.1931	391.354	14.1701	NA
COLUMBITE-K61-6 <>	598.027	196207	121.299	18.0184	0.784229	0.482598	6.00111	0.0630666	5.94964	0.991425	394.248	22.7536	399.854	19.8371	432.359	17.4731	394.248	22.7536	NA
COLUMBITE-K61-7 <>	676.725	63175	123.015	18.4722	0.496144	0.471547	3.69524	0.0631748	3.66178	0.990945	394.904	14.0265	392.257	12.0239	376.659	11.162	394.904	14.0265	NA
COLUMBITE-K61-5 <>	664.386	99433.7	122.705	17.8915	1.43053	0.487635	6.81525	0.0632761	6.66343	0.977723	395.518	25.563	403.298	22.6873	448.083	31.7859	395.518	25.563	NA
COLUMBITE-K61-9 <>	710.84	88331.3	122.158	18.2074	0.734549	0.485544	8.89807	0.0641173	8.86769	0.996587	400.617	34.4444	401.869	29.5387	409.056	16.4324	400.617	34.4444	NA
Mean	647.086	77805.3	128.136	18.3837	0.803291	0.46214	5.42929	0.0616005	5.35491	0.981028	385.345	20.0582	385.691	17.4598	387.56	18.0253	385.345	20.0582
SD	80.0814	41412.8	11.9891	0.213909	0.220804	0.0151052	2.02017	0.00156565	2.04675	0.0197618	9.51134	7.73586	10.4924	6.5832	26.2141	4.89886	9.51134	7.73586

## Sheet: Cyrtolite
Cyrtolite
Kinkel Quarry
Table S1-C. U-Pb geochronologic analyses.
							Isotope ratios						Apparent ages (Ma)
Analysis	U	206Pb	U/Th	206Pb*	±	207Pb*	±	206Pb*	±	error	206Pb*	±	207Pb*	±	206Pb*	±	Best age	±	Conc
	(ppm)	204Pb		207Pb*	(%)	235U*	(%)	238U	(%)	corr.	238U*	(Ma)	235U	(Ma)	207Pb*	(Ma)	(Ma)	(Ma)	(%)
CYR 1 <>	2057.75	125445	217.541	18.4971	0.476175	0.442769	1.23989	0.059399	1.14481	0.923314	371.97	4.13781	372.203	3.86363	373.633	10.7186	371.97	4.13781	NA
CYR 3 <>	1538.9	135160	278.494	18.5295	0.502299	0.452008	1.87761	0.0607449	1.80917	0.963552	380.154	6.67878	378.685	5.93494	369.687	11.3153	380.154	6.67878	NA
CYR 4 <>	2961	343338	204.216	18.4844	0.225339	0.452248	3.23163	0.0606291	3.22376	0.997566	379.45	11.8795	378.853	10.2188	375.177	5.07065	379.45	11.8795	NA
CYR 11 <>	2359.66	48758.1	182.693	18.5119	0.432227	0.446249	1.18321	0.0599138	1.10144	0.93089	375.102	4.01361	374.65	3.70705	371.834	9.73287	375.102	4.01361	NA
CYR 12 <>	2743.55	306746	281.203	18.4995	0.370054	0.451374	1.36394	0.0605612	1.31278	0.962492	379.038	4.83249	378.241	4.30711	373.343	8.33067	379.038	4.83249	NA
CYR 13 <>	2615.55	568759	229.321	18.4311	0.21067	0.465743	2.3319	0.0622581	2.32237	0.995911	389.344	8.77436	388.244	7.52379	381.674	4.73529	389.344	8.77436	NA
CYR 17 <>	1948.34	197803	261.707	18.4746	0.270785	0.452434	1.21803	0.0606219	1.18755	0.974975	379.407	4.37561	378.982	3.85255	376.367	6.09222	379.407	4.37561	NA
CYR 27 <>	1614.3	185392	255.098	18.5057	0.35438	0.448326	0.582063	0.0601723	0.461749	0.793297	376.673	1.68945	376.106	1.82948	372.594	7.97796	376.673	1.68945	NA
CYR 26 <>	3103.81	554394	257.179	18.4614	0.135367	0.402602	9.4348	0.0539062	9.43383	0.999897	338.459	31.1062	343.533	27.5049	377.981	3.04543	338.459	31.1062	NA
Mean	2326.98	273977	240.828	18.4884	0.330811	0.445973	2.4959	0.0598007	2.44416	0.949099	374.4	8.60975	374.388	7.63803	374.699	7.44656	374.4	8.60975
SD	538.324	175474	32.2329	0.0278054	0.120314	0.0164469	2.55987	0.00220925	2.58546	0.0609638	13.4653	8.44423	11.6721	7.40217	3.38588	2.7114	13.4653	8.44423

## Sheet: #525.7
NYSM #525.7
185th Street and Harlem River Drive
Table S1-E. U-Pb geochronologic analyses.
							Isotope ratios						Apparent ages (Ma)
Analysis	U	206Pb	U/Th	206Pb*	±	207Pb*	±	206Pb*	±	error	206Pb*	±	207Pb*	±	206Pb*	±	Best age	±	Conc
	(ppm)	204Pb		207Pb*	(%)	235U*	(%)	238U	(%)	corr.	238U*	(Ma)	235U	(Ma)	207Pb*	(Ma)	(Ma)	(Ma)	(%)
185-H-1 <>	160.383	142659	51.1837	18.8751	2.36106	0.448475	9.52124	0.0613941	9.22385	0.968765	384.098	34.3941	376.211	29.9417	327.911	53.5868	384.098	34.3941	NA
185-H-2 <>	114.966	54914.3	37.2099	18.5705	3.15079	0.458565	10.029	0.0617622	9.52121	0.949368	386.333	35.7035	383.259	32.0263	364.713	71.035	386.333	35.7035	NA
185-H-3 <>	144.093	101507	36.9936	18.3217	2.57202	0.470304	7.00133	0.0624948	6.51178	0.930078	390.78	24.6909	391.399	22.7434	395.037	57.6878	390.78	24.6909	NA
185-H-5 <>	105.4	58503.8	35.1038	19.6782	5.85299	0.409316	10.6975	0.0584175	8.95428	0.837044	365.995	31.8595	348.383	31.5575	232.543	135.216	365.995	31.8595	NA
185-H-6 <>	143.267	65655.6	37.5498	18.5474	2.37462	0.440241	8.26545	0.0592206	7.917	0.957842	370.884	28.5343	370.422	25.6593	367.515	53.4949	370.884	28.5343	NA
185-H-7 <>	139.879	67006.7	34.1535	18.8277	4.23744	0.447817	6.63676	0.0611501	5.10791	0.769639	382.616	18.9751	375.749	20.8465	333.626	96.0955	382.616	18.9751	NA
185-H-8 <>	154.55	62892.9	32.0882	18.455	2.20785	0.437019	9.55659	0.0584942	9.29805	0.972947	366.461	33.1236	368.148	29.5184	378.76	49.6532	366.461	33.1236	NA
185-H-9 <>	133.702	308118	34.8597	17.2757	4.12672	0.478511	8.60445	0.0599551	7.55028	0.877485	375.352	27.531	397.051	28.2834	525.38	90.5158	375.352	27.531	NA
185-H-10 <>	126.604	233712	8.70827	17.6108	4.25591	0.463689	7.81873	0.0592248	6.55895	0.838876	370.91	23.6412	386.82	25.1555	483.152	94.0487	370.91	23.6412	NA
185-H-13 <>	147.804	42953.8	33.5472	18.6114	2.0856	0.453639	9.57993	0.0612334	9.35016	0.976015	383.122	34.7791	379.824	30.3652	359.748	47.0654	383.122	34.7791	NA
185-H-16 <>	252.437	101423	31.7698	18.3752	1.17803	0.477492	6.20797	0.0636352	6.09517	0.98183	397.695	23.5077	396.351	20.3741	388.496	26.449	397.695	23.5077	NA
185-H-17 <>	194.375	63574.8	26.2019	18.5403	2.4815	0.451988	8.0597	0.0607773	7.66818	0.951422	380.351	28.3224	378.671	25.4803	368.384	55.9114	380.351	28.3224	NA
185-H-19 <>	271.918	89758.6	31.4212	18.5531	1.73827	0.470527	6.68793	0.0633139	6.45808	0.965632	395.748	24.7891	391.553	21.732	366.826	39.1669	395.748	24.7891	NA
185-H-20 <>	227.591	94305.7	27.0061	18.5939	2.29383	0.466761	7.62943	0.0629456	7.27644	0.953733	393.514	27.7776	388.949	24.6571	361.867	51.7477	393.514	27.7776	NA
Mean	170.135	107451	30.7836	18.4492	2.9504	0.455609	8.06215	0.0609052	7.39552	0.917712	381.119	27.2943	381.11	25.5311	380.111	66.421	381.119	27.2943
SD	51.2285	76711.2	7.44021	0.565063	1.29759	0.0192224	1.30855	0.0017957	1.276	0.066659	10.9103	4.31736	13.4939	3.59198	69.0246	29.6122	10.9103	4.31736

## Sheet: #525.8
NYSM #525.8
Fort George
Table S1-F. U-Pb geochronologic analyses.
							Isotope ratios						Apparent ages (Ma)
Analysis	U	206Pb	U/Th	206Pb*	±	207Pb*	±	206Pb*	±	error	206Pb*	±	207Pb*	±	206Pb*	±	Best age	±	Conc
	(ppm)	204Pb		207Pb*	(%)	235U*	(%)	238U	(%)	corr.	238U*	(Ma)	235U	(Ma)	207Pb*	(Ma)	(Ma)	(Ma)	(%)
COLUMBITE-FT-11 <>	499.862	78161.6	86.8114	18.5238	0.907031	0.416462	4.51688	0.0559505	4.42488	0.97963	350.951	15.1141	353.518	13.4854	370.383	20.4296	350.951	15.1141	NA
COLUMBITE-FT-2 <>	510.236	83561.5	80.2117	18.5872	0.813127	0.422524	7.0548	0.0569593	7.00778	0.993336	357.107	24.3449	357.854	21.2799	362.683	18.3392	357.107	24.3449	NA
COLUMBITE-FT-3 <>	504.405	86157.8	80.561	18.439	1.12204	0.437366	5.07472	0.05849	4.94912	0.97525	366.436	17.6296	368.393	15.6803	380.705	25.2046	366.436	17.6296	NA
COLUMBITE-FT-1 <>	499.926	78252.8	82.2015	18.5917	0.780317	0.43478	6.98093	0.0586256	6.93718	0.993733	367.262	24.7656	366.565	21.4829	362.14	17.579	367.262	24.7656	NA
COLUMBITE-FT-7 <>	499.948	79127.8	79.6836	18.4101	0.686895	0.447489	6.3288	0.05975	6.29141	0.994093	374.105	22.8666	375.52	19.8689	384.236	15.4334	374.105	22.8666	NA
COLUMBITE-FT-10 <>	503.99	84003.3	78.73	18.4606	0.933189	0.446793	5.04094	0.0598205	4.95381	0.982716	374.534	18.0251	375.031	15.808	378.081	20.9897	374.534	18.0251	NA
COLUMBITE-FT-4 <>	500.841	74449.6	82.6275	18.5317	0.796296	0.445503	5.07268	0.0598776	5.00979	0.987602	374.881	18.2451	374.125	15.8757	369.427	17.9358	374.881	18.2451	NA
COLUMBITE-FT-8 <>	499.864	92674.4	81.9304	18.5255	0.497688	0.44573	4.2945	0.0598881	4.26557	0.993262	374.945	15.5373	374.285	13.4448	370.181	11.2105	374.945	15.5373	NA
COLUMBITE-FT-6 <>	493.992	84185	76.4708	18.5116	1.21054	0.447365	4.25529	0.0600627	4.07947	0.958682	376.007	14.9003	375.432	13.3557	371.865	27.2368	376.007	14.9003	NA
COLUMBITE-FT-9 <>	500.817	97160.8	78.0334	18.4712	1.1248	0.453653	9.26824	0.0607741	9.19974	0.992608	380.331	33.9776	379.834	29.3773	376.783	25.2881	380.331	33.9776	NA
COLUMBITE-FT-5 <>	493.583	84822.2	79.261	18.5129	1.31442	0.457143	4.57931	0.0613797	4.38661	0.95792	384.011	16.3532	382.269	14.5885	371.715	29.5899	384.011	16.3532	NA
COLUMBITE-FT-12 <>	494.64	84320.7	79.7524	18.5706	1.04836	0.457985	4.80955	0.0616843	4.6939	0.975954	385.86	17.5805	382.855	15.3414	364.705	23.622	385.86	17.5805	NA
Mean	500.175	83906.5	80.5229	18.5113	0.936226	0.442733	5.60639	0.0594385	5.51661	0.982066	372.202	19.945	372.14	17.4657	371.909	21.0715	372.202	19.945
SD	4.53842	6028.24	2.54286	0.0548895	0.226445	0.0123402	1.44997	0.00162008	1.4742	0.0125662	9.86332	5.37502	8.71668	4.55068	6.67797	5.08988	9.86332	5.37502
